# Supplementary material
Source: MDPI journal article supplement (https://www.mdpi.com/1999-4907/6/7/2281)
Supplement: s1 [file s1]

Supplementary


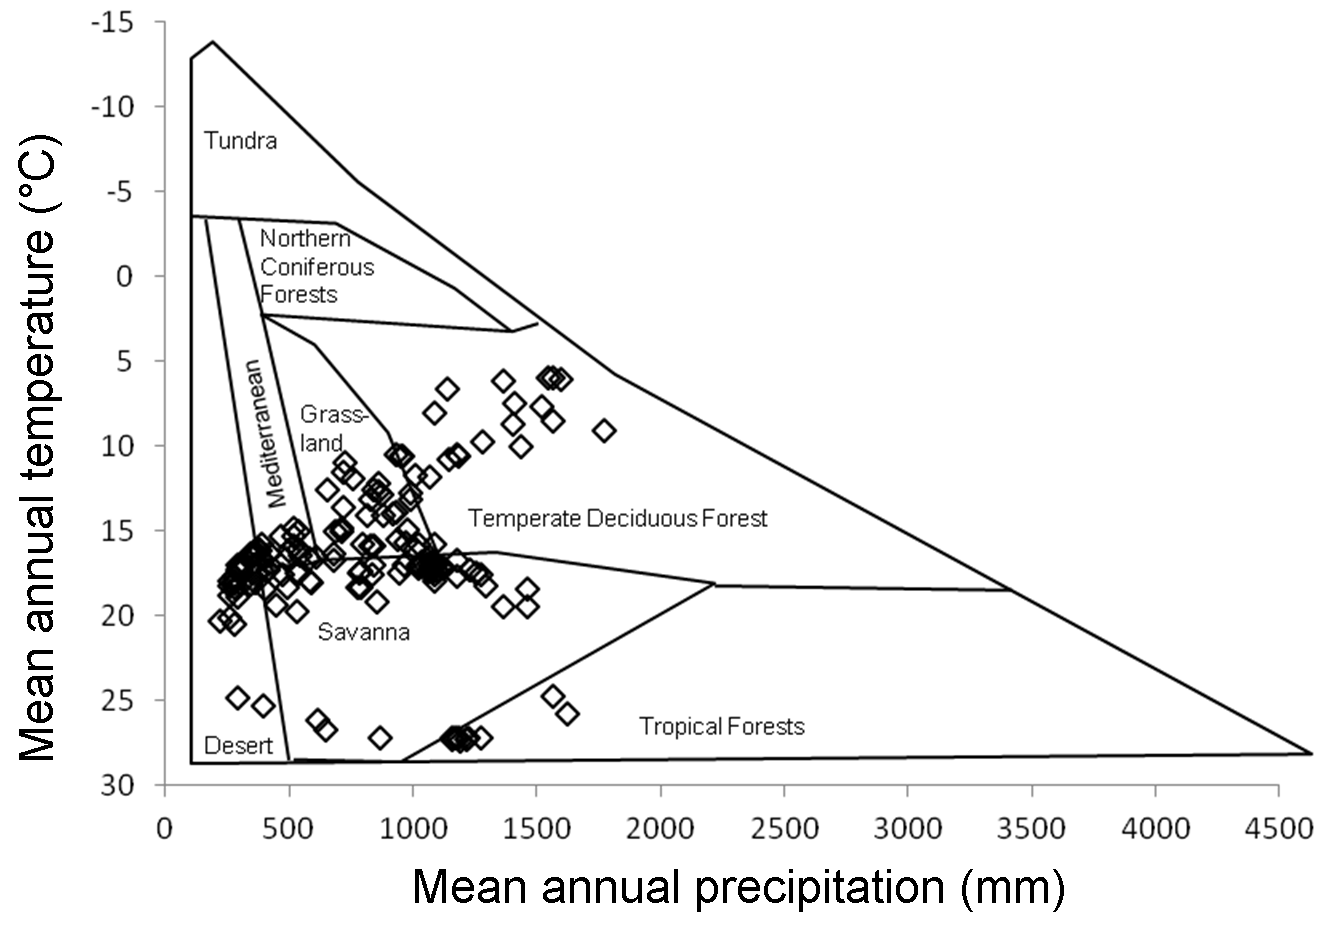


**Figure S1.** Plot of mean annual precipitation and mean annual temperature for all species in the database in relation to their biome classification. The biome figure is adapted from Forseth, I. Terrestrial Biomes. *Nature Education Knowledge* 2010, *3*(10), 11 .

**Figure S2.** *Cont.*

**Figure S2.** Changes in the osmotic potential at full turgor (osmotic potential) between well-watered and water stressed species for (**A**). Seedlings water stress in these experimental studies came about via manipulation of water supply and (**B**). Saplings or adults—Water stress in the majority of these studies was driven primarily by natural changes in water availability. Negative values represent active osmotic adjustment.

References Included in Database

1. Bachelard, E.P. Effects of soil moisture stress on the growth of seedlings of three eucalypt species. II. Growth effects. *Aust. For. Res.* **1986**, *16*, 51–61.
2. Bannister, P. Drought resistance, water potential and water content in some New Zealand plants. *Flora* **1986**, *178*, 23–40.
3. Blackman, C.J.; Brodribb, T.J.; Jordan, G.J. Leaf hydraulic vulnerability is related to conduit dimensions and drought resistance across a diverse range of woody angiosperms. *New Phytol.* **2010**, *188*, 1113–1123.
4. Blake, J.; Hill, R. An examination of the drought and frost tolerance of *Banksia marginata* (proteaceae) as an explanation of its current widespread occurrence in tasmania. *Aust. J. Bot.* **1996**, *44*, 265–281.
5. Callister, A.N.; Arndt, S.K.; Adams, M.A. Comparison of four methods for measuring osmotic potential of tree leaves. *Physiol. Plant* **2006**, *127*, 383–392.
6. Carter, J.L.; Veneklaas, E.J.; Colmer, T.D.; Eastham, J.; Hatton, T.J. Contrasting water relations of three coastal tree species with different exposure to salinity. *Physiol. Plant* **2006**, *127*, 360–373.
7. Clayton-Greene, K.A. The tissue water relationships of *Callitris columellaris*, *Eucalyptus melliodora* and *Eucalyptus microcarpa* investigated using the pressure-volume technique. *Oecologia* **1983**, *57*, 368–373.
8. Conover, D.; Sovonick-Dunford, S. Influence of water deficits on the water relations and growth of *Echinochloa turneriana*, *Echinochloa crus-gall* and *Pennisetum americanum*. *Funct. Plant Biol.* **1989**, *16*, 291–304.
9. Crombie, D.; Milburn, J. Water relations of rural eucalypt dieback*. Aust. J. Bot.* **1988**, *36*, 233–237.
10. Dalmaris, E. *Eucalyptus wandoo*: Tolerance to Drought and Salinity in Relation to Provenance and Evolutionary History in Southwestern Australia. Ph.D. Thesis, The University of Western Australia, Perth, Australia, July 2012.
11. Doley, D. Water relations of *Eucalyptus marginata* sm. under natural conditions. *J. Ecol.* **1967**, *55*, 597–614.
12. Eamus, D.; Berryman, C.; Duff, G. The impact of CO2 enrichment on water relations in *Maranthes corymbosa* and *Eucalyptus tetrodonta*. *Aust. J. Bot.* **1995**, *43*, 273–282.
13. Fan, S.; Blake, T.J.; Blumwald, E. The relative contribution of elastic and osmotic adjustments to turgor maintenance of woody species. *Physiol. Plant* **1994**, *90*, 408–413.
14. Fordyce, I.R.; Duff, G.A.; Eamus, D. The water relations of *Allosyncarpia ternata* (Myrtaceae) at contrasting sites in the monsoonal tropics of northern Australia. *Aust. J. Bot.* **1997**, *45*, 259–274.
15. Gaff, D.F.; Carr, D.J. The quantity of water in the cell wall and its significance. *Aust. J. Biol. Sci.* **1961**, *14*, 299.
16. Hoy, E. Plant Form and Function from an Ecohydrological Perspective in the Australian Arid zone, with Reference to Mine-Site Rehabilitation. Ph.D. Thesis, The University of Western Australia, Perth, Australia, June 2014.
17. Körner, C.; Cochrane, P.M. Stomatal responses and water relations of *Eucalyptus pauciflora* in summer along an elevational gradient. *Oecologia* **1985**, *66*, 443–455.
18. Ladiges, P.Y. Some aspects of tissue water relations in three populations of *Eucalyptus viminalis* labill. *New Phytol.* **1975**, *75*, 53–62.
19. Lemcoff, J.H.; Guarnaschelli, A.B.; Garau, A.M.; Prystupa, P. Elastic and osmotic adjustments in rooted cuttings of several clones of *Eucalyptus camaldulensis* dehnh. From southeastern Australia after a drought. *Flora* **2002**, *197*, 134–142.
20. Lenz, T.I.; Wright, I.J.; Westoby, M. Interrelations among pressure-volume curve traits across species and water availability gradients. *Physiol. Plant* **2006**, *127*, 423–433.
21. Merchant, A.; Callister, A.; Arndt, S.K.; Tausz, M.; Adams, M.A. Contrasting physiological responses of six eucalyptus species to water deficit. *Ann. of Bot.* **2007**, *100*, 1507–1515.
22. Mitchell, P.J.; Veneklaas, E.J.; Lambers, H.; Burgess, S.S.O. Leaf water relations during summer water deficit: Differential responses in turgor maintenance and variation in leaf structure among different plant communities in south-western Australia. *Plant Cell Environ.* **2008**, *31*, 1791–1802.
23. Mitchell, P.J.; O’Grady, A.P.; Tissue, D.T.; White, D.A.; Ottenschlaeger, M.L.; Pinkard, E.A. Drought response strategies define the relative contributions of hydraulic dysfunction and carbohydrate depletion during tree mortality. *New Phytol.* **2013**, *197*, 862–872.
24. Mollon, A.D. *Role of Water Stress on Mixed Species Stands of Eucalyptus L’Herit*; School of Plant Science: Tasmania, Australia, 1998.
25. Myers, B.A.; Neales, T.F. Osmotic adjustment, induced by drought, in seedlings of 3 eucalyptus species. *Aust. J. Plant Physiol.* **1986**, *13*, 597–603.
26. Myers, B.A.; Neales, T.F. Seasonal-changes in the water relations of *Eucalyptus behriana* f muell and Eucalyptus microcarpa (maiden) maiden in the field. *Aust. J. Bot.* **1984**, *32*, 495–510.
27. Myers, B.; Duff, G.; Eamus, D.; Fordyce, I.; OGrady, A.; Williams, R. Seasonal variation in water relations of trees of differing leaf phenology in a wet-dry tropical savanna near Darwin, northern Australia. *Aust. J. Bot.* **1997**, *45*, 225–240.
28. Ngugi, M.R.; Doley, D.; Hunt, M.A.; Dart, P.; Ryan, P. Leaf water relations of *Eucalyptus cloeziana* and *Eucalyptus argophloia* in response to water deficit. *Tree Physiol.* **2003**, *23*, 335–343.
29. Paliyavuth, C.; Clough, B.; Patanaponpaiboon, P. Salt uptake and shoot water relations in mangroves. *Aquat. Bot.* **2004**, *78*, 349–360.
30. Poot, P.; Veneklaas, E. Species distribution and crown decline are associated with contrasting water relations in four common sympatric eucalypt species in southwestern Australia. *Plant Soil* **2013**, *364*, 409–423.
31. Prior, L.D.; Eamus, D. Seasonal changes in leaf water characteristics of *Eucalyptus tetrodonta* and *Terminalia ferdinandiana* saplings in a northern Australian savanna. *Aust. J. Bot.* **1999**, *47*, 587–599.
32. Read, J.; Hill, R.S.; Hope, G.S. Contrasting responses to water deficits of Nothofagus species from tropical New Guinea and high-latitude temperate forests: Can rainfall regimes constrain latitudinal range? *J. Biogeogr.* **2010**, *37*, 1962–1976.
33. Richards, M.; Lamont, B. Post-fire mortality and water relations of three congeneric shrub species under extreme water stress — a trade-off with fecundity? *Oecologia* **1996**, *107*, 53–60.
34. Rutherford, S.; Griffith, S.J.; Warwick, N.W.M. Water relations of selected wallum species in dry sclerophyll woodland on the lower north coast of New South Wales, Australia. *Aust. J. Bot.* **2013**, *61*, 254–265.
35. Sommerville, K.E.; Read, J. Contrasting water-use strategies in two sympatric cool-temperate rainforest species, *Nothofagus cunninghamii* (Nothofagaceae) and *Atherosperma moschatum* (Atherospermataceae). *Aust. J. Bot.* **2008**, *56*, 109–118.
36. Stoneman, G.L.; Turner, N.C.; Dell, B. Leaf growth, photosynthesis and tissue water relations of greenhouse-grown *Eucalyptus marginata* seedlings in response to water deficits. *Tree Physiol.* **1994**, *14*, 633–646.
37. Szota, C.; Farrell, C.; Koch, J.M.; Lambers, H.; Veneklaas, E.J. Contrasting physiological responses of two co-occurring eucalypts to seasonal drought at restored bauxite mine sites.
    *Tree Physiol.* **2011**, *31*, 1052–1066.
38. Tuomela, K. Leaf water relations in six provenances of *Eucalyptus microtheca*: A greenhouse experiment. *For. Ecol. Manag.* **1997**, *92*, 1–10.
39. Warren, C.; Aranda, I.; Cano, F.J. Metabolomics demonstrates divergent responses of two eucalyptus species to water stress. *Metabolomics* **2012**, *8*, 186–200.
40. White, D.A.; Turner, N.C.; Galbraith, J.H. Leaf water relations and stomatal behaviour of four allopatric eucalyptus species planted in mediterranean southwestern Australia. *Tree Physiol.* **2000**, *20*, 1157–1165.
41. White, D.A.; Battaglia, M.; Macfarlane. C.; Mummery, D.; McGrath, J.F.; Beadle, C.L. Selecting species for recharge management in mediterranean south western Australia—Some ecophysiological considerations. *Plant Soil* **2003**, *257*, 283–293.
42. White, D.A.; Beadle, C.L.; Worledge, D. Leaf water relations of *Eucalyptus globulus* ssp. globulus and *E. nitens*: Seasonal, drought and species effects. *Tree Physiol.* **1996**, *16*, 469–476.
43. Wilson, J.R.; Fisher, M.J.; Schulze, E.D.; Dolby, G.R.; Ludlow, M.M. Comparison between pressure-volume and dewpoint-hygrometry techniques for determining the water relations characteristics of grass and legume leaves. *Oecologia* **1979**, *41*, 77–88.
44. Wilson, J.; Ludlow, M.; Fisher, M.; Schulze, E. Adaptation to water stress of the leaf water relations of four tropical forage species. *Funct. Plant Biol.* **1980**, *7*, 207–220.
45. Wang, D.; Bachelard, E.P.; Banks, J.C.G. Growth and water relations of seedlings of two subspecies of *Eucalyptus globulus*. *Tree Physiol.* **1988**, *4*, 129–138.
